# Supplementary material
Source: publisher figshare collection journal article supplement (https://acs.figshare.com/ndownloader/files/30470935)

## Supporting Information

For

### **Molecular Mapping of Neutral Lipids using Silicon Nanopost Arrays and TIMS Imaging Mass Spectrometry**

Jarod A. Fincher<sup>1,2</sup>, Katerina V. Djambazova<sup>1,3</sup>, Dustin R. Klein<sup>1,2</sup>, Martin Dufresne<sup>1,2</sup>, Lukasz G. Migas<sup>4</sup>, Raf Van de Plas<sup>1,2,4</sup>, Richard M. Caprioli<sup>1,2,3,5,6</sup>, and Jeffrey M. Spraggins<sup>1,2,3,7\*</sup>

<sup>1</sup>*Mass Spectrometry Research Center, Vanderbilt University, 465 21<sup>st</sup> Ave S #9160, Nashville, TN 37235*

<sup>2</sup>*Department of Biochemistry, Vanderbilt University, 607 Light Hall, Nashville, TN 37205, USA*

<sup>3</sup>*Department of Chemistry, Vanderbilt University, 7330 Stevenson Center, Station B 351822, Nashville, TN 37235, USA*

<sup>4</sup>*Delft Center for Systems and Control, Delft University of Technology, 2628 CD Delft, The Netherlands*

<sup>5</sup>*Department of Pharmacology, Vanderbilt University, 442 Robinson Research Building, 2220 Pierce Avenue, Nashville, TN 37232, USA*

<sup>6</sup>*Department of Medicine, Vanderbilt University, 465 21<sup>st</sup> Ave S #9160, Nashville, TN 37235, USA*

<sup>7</sup>*Department of Cell & Developmental Biology, Vanderbilt University, 465 21<sup>st</sup> Ave S #9160, Nashville, TN 37235, USA*

*\*Corresponding Author:*

Jeffrey M. Spraggins, Ph.D.  
Department of Cell and Developmental Biology  
Mass Spectrometry Research Center  
465 21<sup>st</sup> Ave. South, MRBIII 9160  
Vanderbilt University  
Nashville, TN 37232  
Jeff.spraggins@vanderbilt.edu

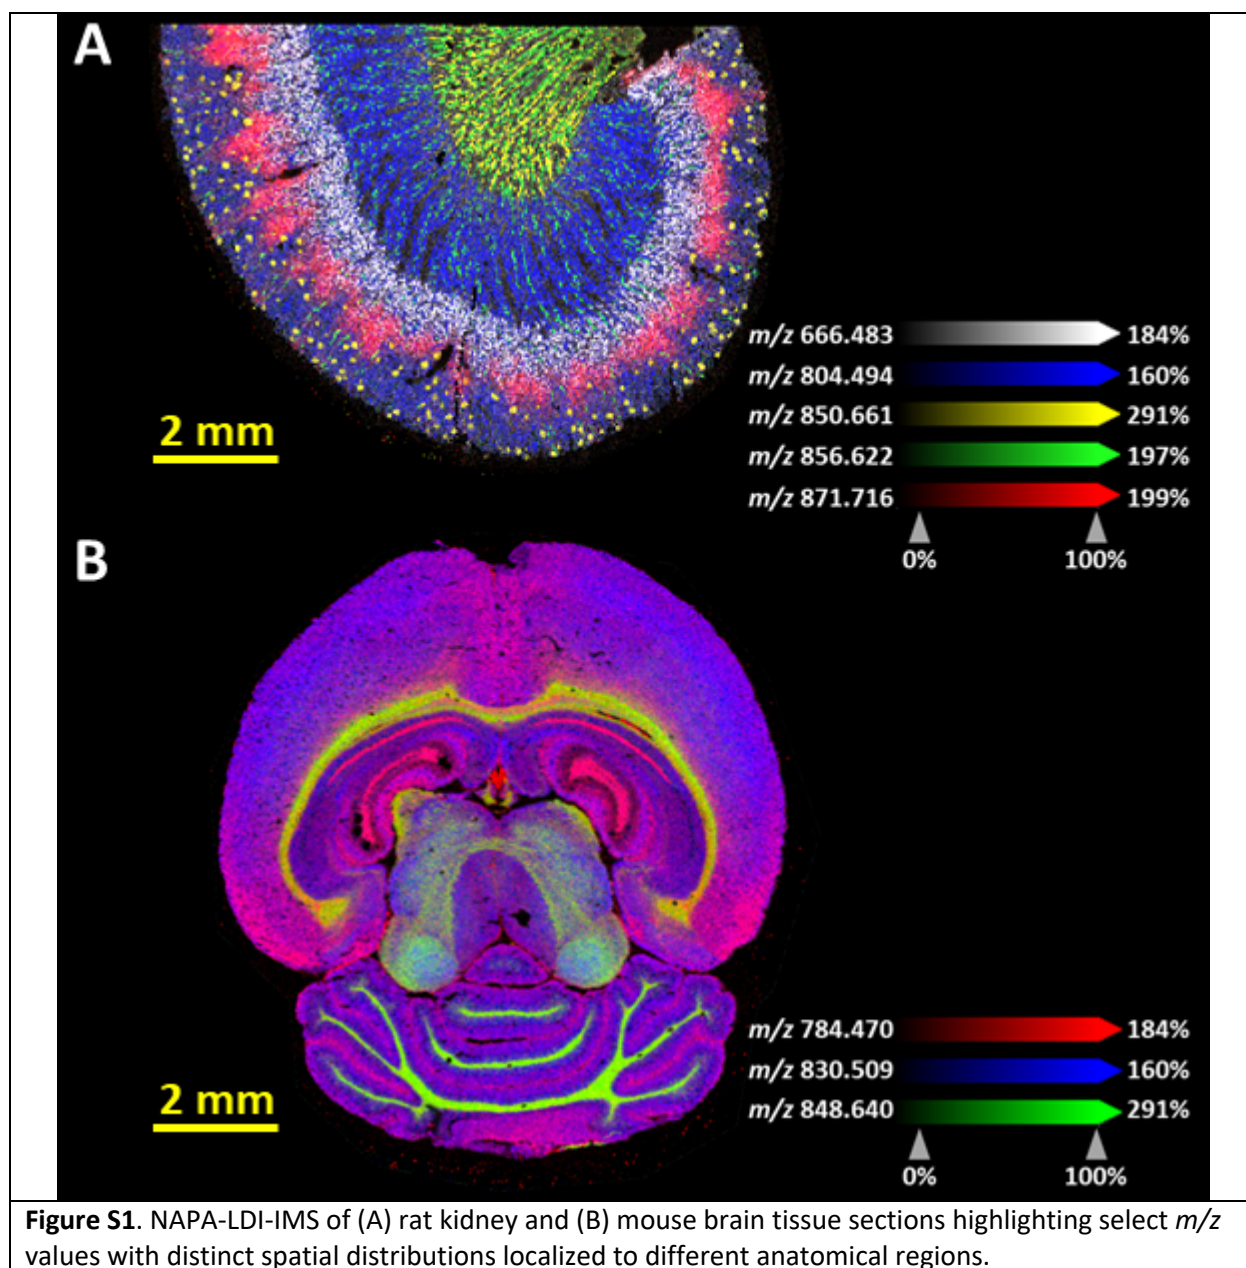

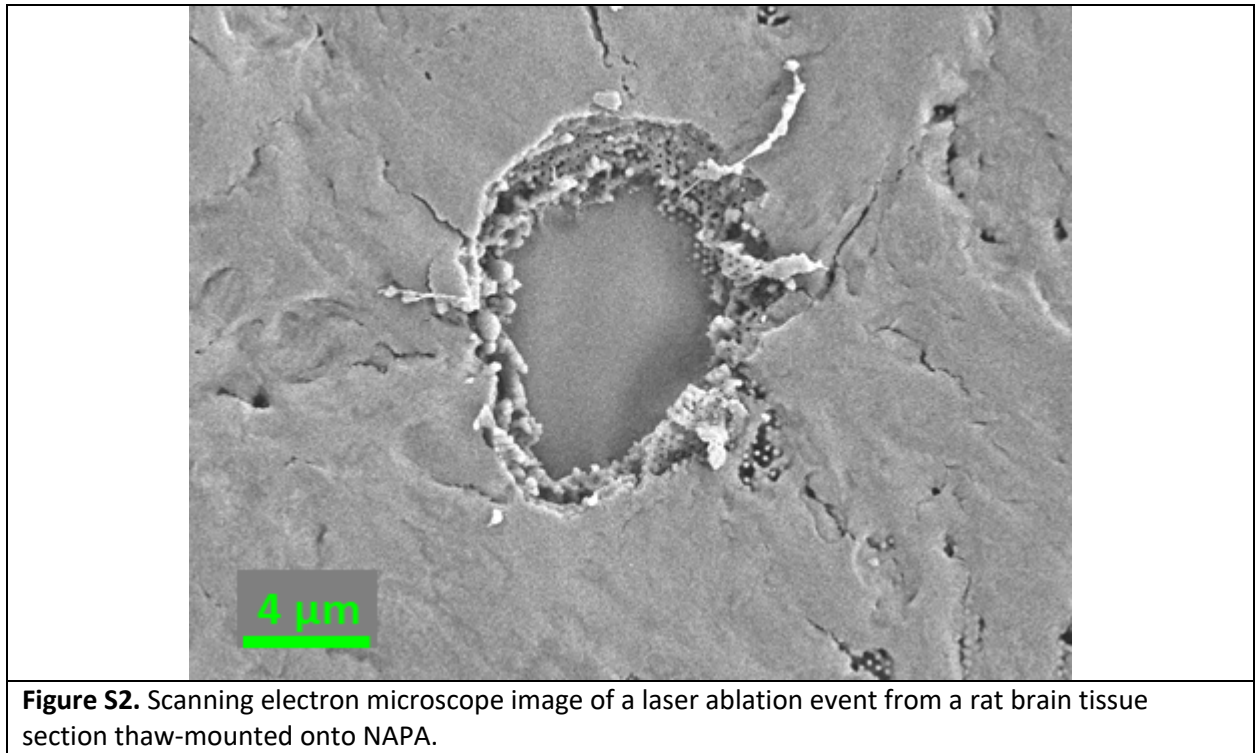

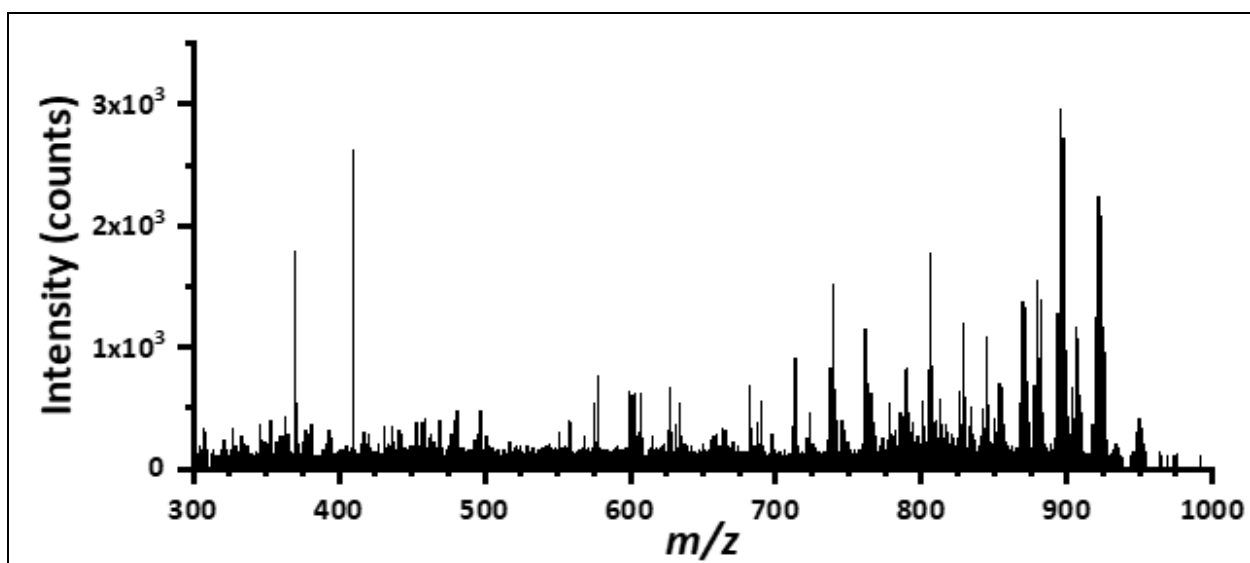

**Figure S3.** Averaged mass spectrum from imaging of rat kidney tissue section at 20  $\mu\text{m}$  spatial resolution.

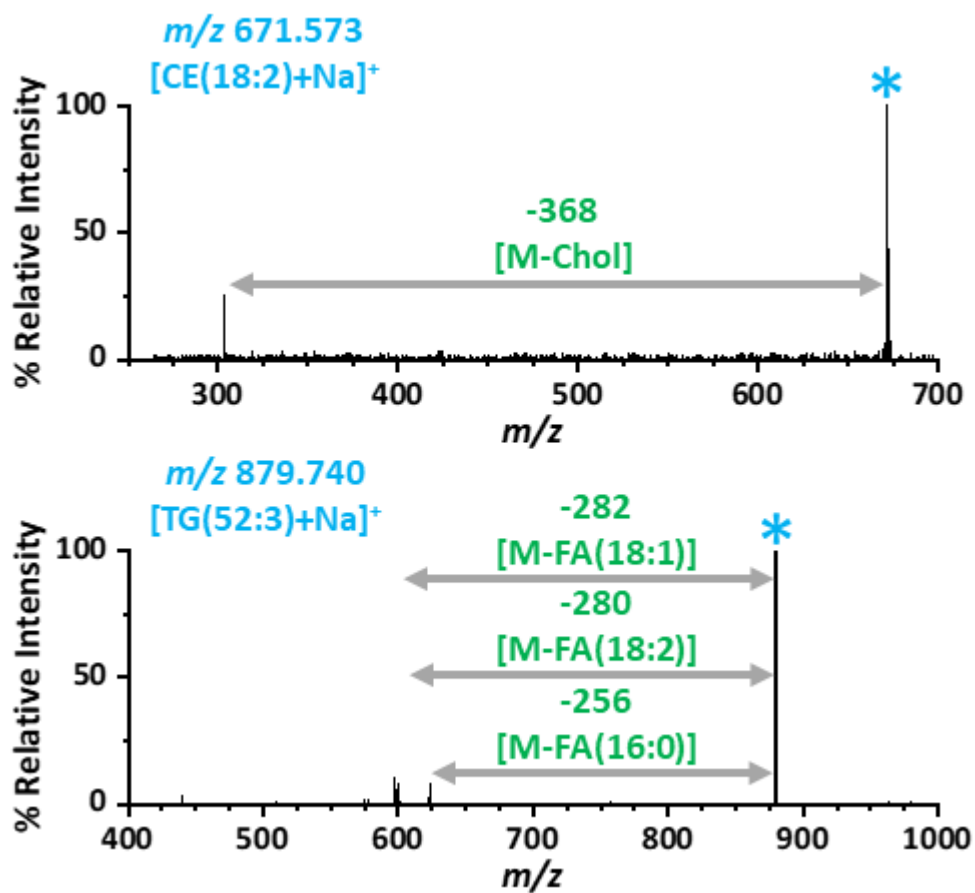

**Figure S4.** Tandem MSMS of neutral lipid species CE(18:2) and TG(52:3) collected from outer cortex region of rat kidney using collisional induced dissociation.

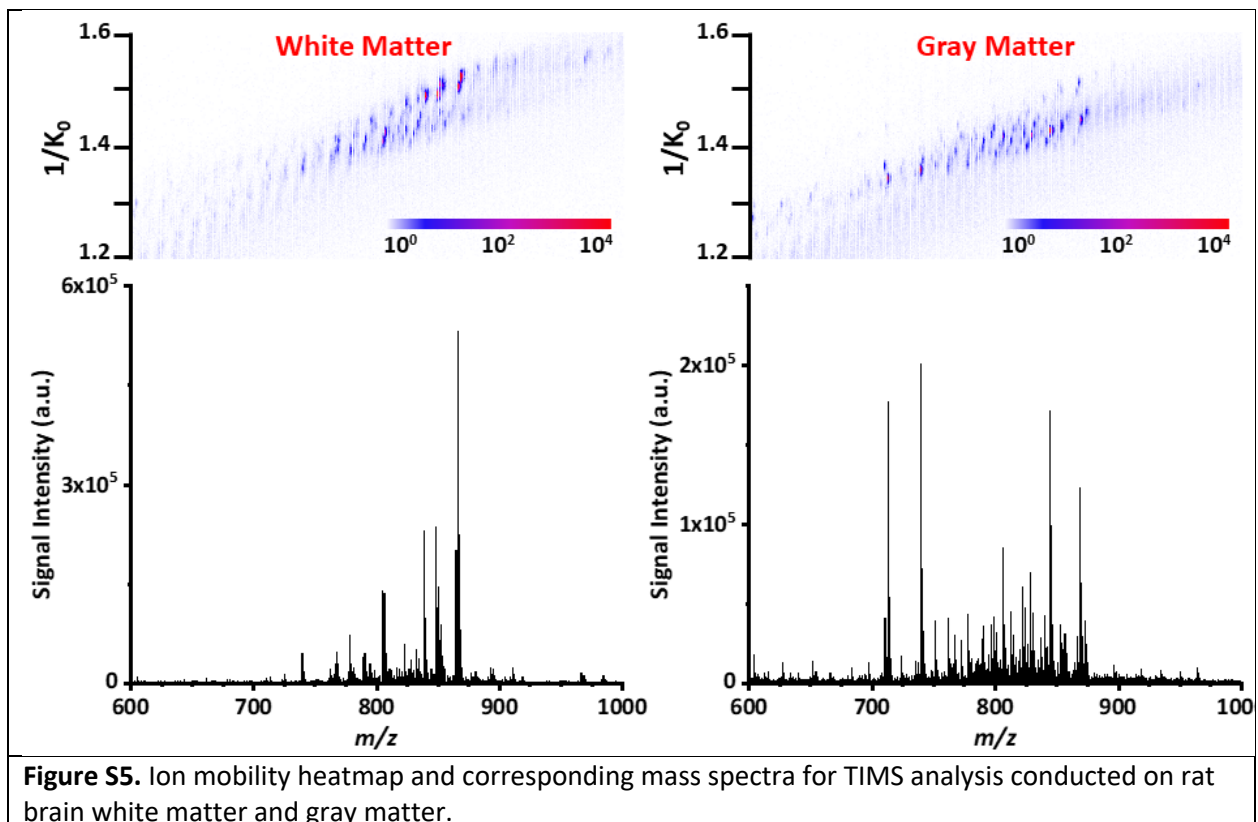

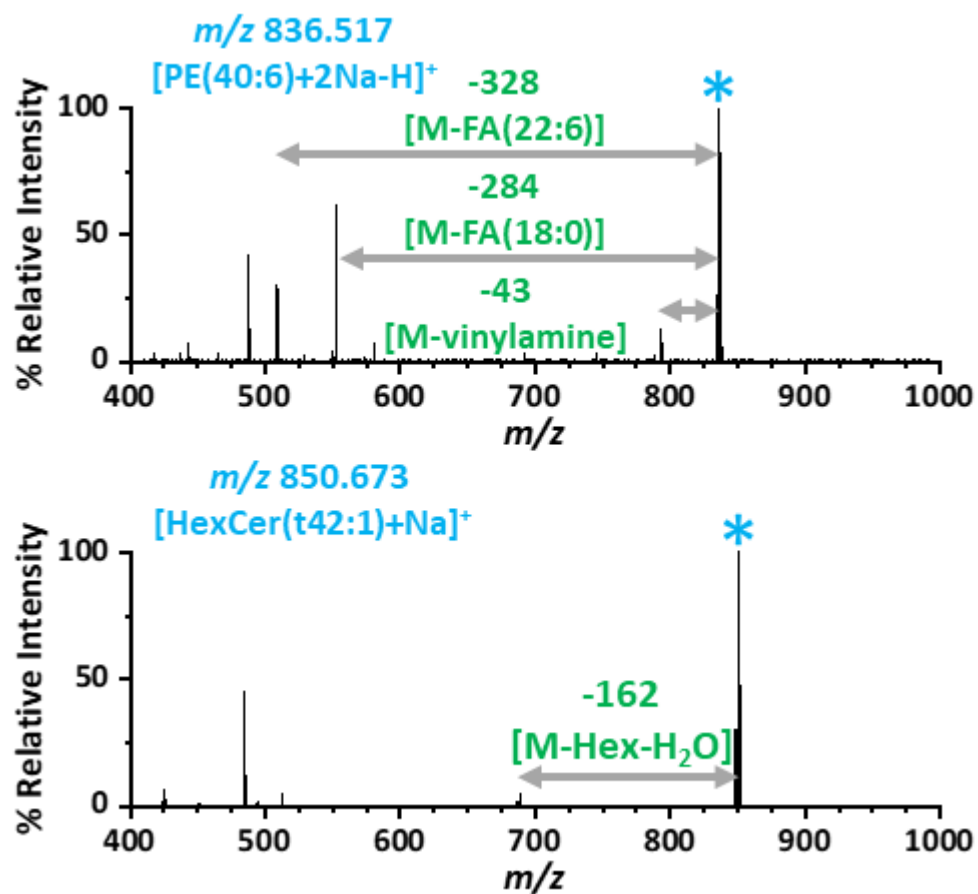

**Figure S6.** Tandem MSMS of lipid species PE(40:6) and HexCer(42:1) collected from rat brain tissue using collisional induced dissociation.

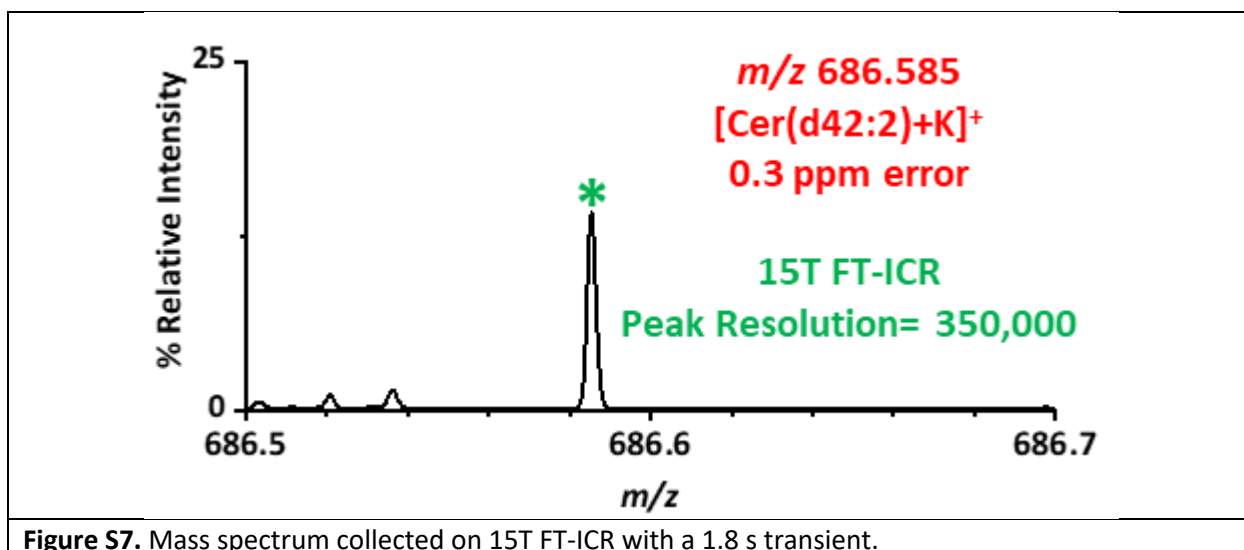

Supplement: Supplementary file 1 [file 30470935]
